# Supplementary material for: Chemoresistance in the Human Triple-Negative Breast Cancer Cell Line MDA-MB-231 Induced by Doxorubicin Gradient Is Associated with Epigenetic Alterations in Histone Deacetylase
Source: Hindawi journal article supplement (doi:10.1155/2019/1345026), 2019-06-02
Supplement: f1 [file 1345026.f1.pdf]

## **Journal of Oncology**

# **Chemoresistance in the human triple-negative breast cancer cell line MDA-MB-231 induced by doxorubicin gradient is associated with epigenetic alterations in histone deacetylase**

Jeonghun Han,<sup>1,2</sup> Wanyoung Lim,<sup>3</sup> Daeun You,<sup>4</sup> Yisun Jeong,<sup>4</sup> Sangmin Kim,<sup>5</sup> Jeong Eon Lee,<sup>4,5</sup> Tae Hwan Shin,<sup>6</sup> Gwang Lee,<sup>6</sup> and Sungsu Park<sup>2,7\*</sup>

<sup>1</sup>Regenerative Medicine and Cell Therapy Institute, Seoul National University Hospital Bundang, Seongnam 13620, Korea

<sup>2</sup>School of Mechanical Engineering, Sungkyunkwan University, Suwon 16419, Korea

<sup>3</sup>Department of Biomedical Engineering, Sungkyunkwan University, Suwon 16419, Korea

<sup>4</sup>Department of Health Sciences and Technology, Samsung Advanced Institute for Health Sciences and Technology (SAIHST), Sungkyunkwan University, Seoul 06351, Korea

<sup>5</sup>Breast Cancer Center, Samsung Medical Center, Seoul 06351, Korea

<sup>6</sup> Department of Physiology, Ajou University School of Medicine, Suwon 16499, Korea

<sup>7</sup>Biomedical Institute for Convergence at SKKU (BICS), Sungkyunkwan University, Suwon 16419, Korea

\* Correspondence should be addressed to Sungsu Park; School of Mechanical Engineering, Sungkyunkwan University, Seobu-ro, Suwon 16419, Kyunggi-do, Republic of Korea/Email: [nanopark@skku.edu](mailto:nanopark@skku.edu)/ Tel: +82-31-290-7431/Fax: +82-31-290-5889

Supplementary material:

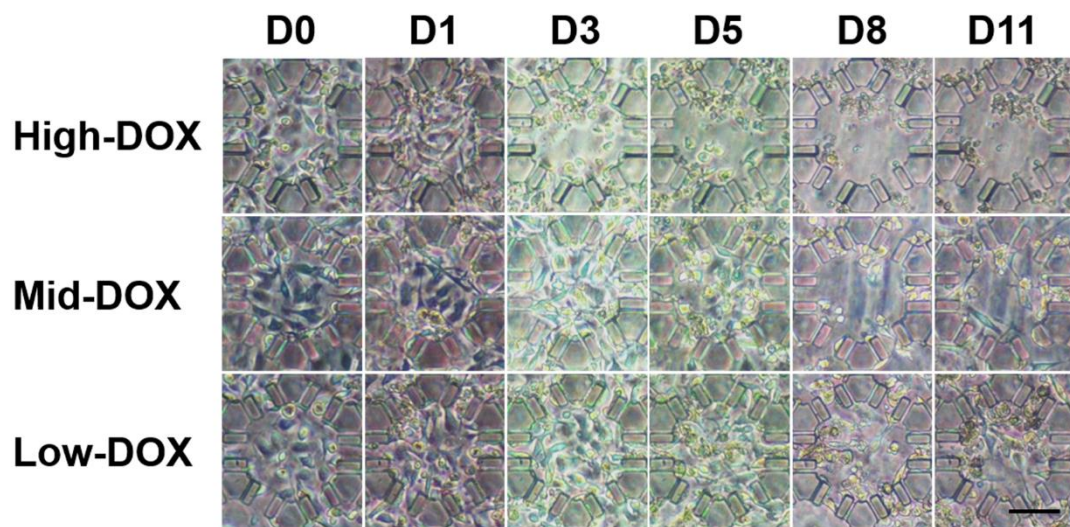

Figure S1: Cell morphology on one of the marked chambers tracked for 11 days in Figure 1(e). Black bar = 100  $\mu\text{m}$ .
